# Supplementary material for: Allogeneic Umbilical Cord-Derived Mesenchymal Stem Cells as a Potential Source for Cartilage and Bone Regeneration: An In Vitro Study
Source: Hindawi journal article supplement (doi:10.1155/2017/1732094), 2017-01-01
Supplement: f1 [file 1732094.f1.pdf]

| Sample #             | Age of donor | Sex of the child | Umbilical cord weight (gr) | Umbilical cord length (cm) | n° cells at P1 x 10 <sup>6</sup> | cells x 10 <sup>6</sup> at P1/gr tissue |
|----------------------|--------------|------------------|----------------------------|----------------------------|----------------------------------|-----------------------------------------|
| 1                    | 29           | M                | 26.30                      | 23.50                      | 21.60                            | 0.82                                    |
| 2                    | 39           | F                | 23.90                      | 38.50                      | 0.00                             | 0.00                                    |
| 3                    | 38           | M                | 44.50                      | 75.00                      | 24.00                            | 0.54                                    |
| 4                    | 28           | F                | 39.80                      | 58.00                      | 25.00                            | 0.63                                    |
| 5                    | 36           | F                | 16.50                      | 20.00                      | 23.00                            | 1.39                                    |
| 6                    | 30           | M                | 66.00                      | 51.00                      | 24.00                            | 0.36                                    |
| 7                    | 24           | M                | 32.30                      | 34.50                      | 21.00                            | 0.65                                    |
| 8                    | 34           | M                | 22.10                      | 46.00                      | 25.00                            | 1.13                                    |
| 9                    | 41           | F                | 20.20                      | 35.00                      | 0.00                             | 0.00                                    |
| 10                   | 33           | M                | 25.10                      | 37.00                      | 0.00                             | 0.00                                    |
| 11                   | 25           | M                | 30.10                      | 45.00                      | 0.00                             | 0.00                                    |
| 12                   | 32           | F                | 32.30                      | 32.00                      | 22.00                            | 0.68                                    |
| 13                   | 34           | M                | 26.20                      | 37.00                      | 23.00                            | 0.88                                    |
| 14                   | 30           | M                | 23.20                      | 45.00                      | 21.00                            | 0.91                                    |
| 15                   | 39           | F                | 31.20                      | 36.00                      | 24.00                            | 0.77                                    |
|                      |              |                  |                            |                            |                                  |                                         |
| <b>Standard Dev.</b> | 5.19         |                  | 12.20                      | 13.55                      | 10.63                            | 0.44                                    |
| <b>MEDIA</b>         | 32.80        |                  | 30.65                      | 40.90                      | 16.91                            | 0.58                                    |
