# Supplementary material for: Allogeneic Umbilical Cord-Derived Mesenchymal Stem Cells as a Potential Source for Cartilage and Bone Regeneration: An In Vitro Study
Source: Hindawi journal article supplement (doi:10.1155/2017/1732094), 2017-01-01

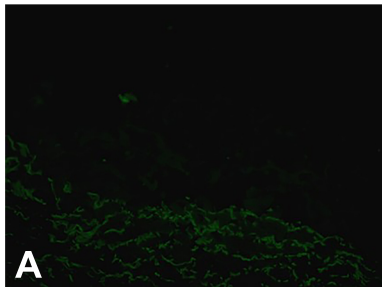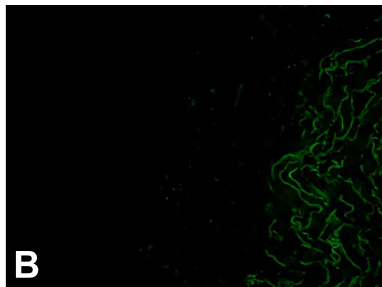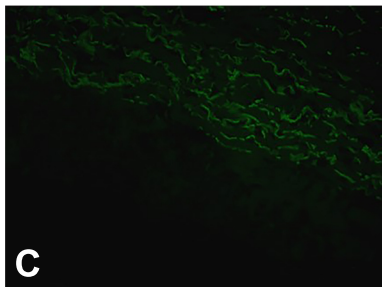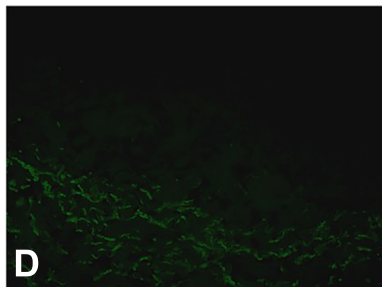

Supplement: f3 [file 1732094.f3.pdf]
